# Supplementary material for: Development of a new High Resolution Melting (HRM) assay for identification and differentiation of Mycobacterium tuberculosis complex samples
Source: PubMed Central journal article supplement (PMC6372708; doi:10.1038/s41598-018-38243-6), 2019-02-12
Supplement: 41598_2018_38243_MOESM1_ESM.pdf [file 41598_2018_38243_MOESM1_ESM.pdf]

# Development of a new High Resolution Melting (HRM) assay for identification and differentiation of *Mycobacterium tuberculosis* complex samples

Patricia Landolt, Roger Stephan, Simone Scherrer

## Supplementary information

**Supplementary Table <sup>S1</sup>.** Raw data set and statistical parameters generated from the intra- and inter-assay using a randomly chosen subset of 22 cultured samples.

| Isolate                |             |            | Run 1 |       |         |      |      | Run 2           |       |       |         |      | Run 3 |                 |       |       |         | Inter-Assay |      |                 |         |      |      |                 |
|------------------------|-------------|------------|-------|-------|---------|------|------|-----------------|-------|-------|---------|------|-------|-----------------|-------|-------|---------|-------------|------|-----------------|---------|------|------|-----------------|
| MTBC member            | sample no   | origin     | Ct    | Tm    | Mean Tm | SD   | CV%  | Intra-assay CV% | Ct    | Tm    | Mean Tm | SD   | CV%   | Intra-assay CV% | Ct    | Tm    | Mean Tm | SD          | CV%  | Intra-assay CV% | Mean Tm | SD   | CV%  | Inter-assay CV% |
| <i>M. microti</i>      | ATCC 19422  |            | 23.08 | 86.75 |         |      |      |                 | 23.15 | 86.72 |         |      |       |                 | 23.38 | 86.73 |         |             |      |                 | 86.73   | 0.02 | 0.02 |                 |
| <i>M. bovis</i>        | BCG Pasteur | ATCC 35734 | 28.46 | 86.60 |         |      |      |                 | 28.63 | 86.58 |         |      |       |                 | 29.46 | 86.58 |         |             |      |                 | 86.59   | 0.01 | 0.01 |                 |
| <i>M. tuberculosis</i> | H37Rv       |            | 25.80 | 86.93 |         |      |      |                 | 26.06 | 86.98 |         |      |       |                 | 26.36 | 86.95 |         |             |      |                 | 86.95   | 0.03 | 0.03 |                 |
| <i>M. tuberculosis</i> | 15-961 2B   | elephant   | 18.47 | 86.97 | 86.96   | 0.01 | 0.01 |                 | 18.50 | 87.00 | 87.00   | 0.00 | 0.00  |                 | 18.89 | 86.98 | 86.98   | 0.02        | 0.02 |                 | 86.98   | 0.02 | 0.03 |                 |
|                        |             |            | 18.49 | 86.95 |         |      |      |                 | 18.41 | 87.00 |         |      |       |                 | 18.97 | 86.97 |         |             |      |                 |         |      |      |                 |
|                        |             |            | 18.47 | 86.95 |         |      |      |                 | 18.53 | 87.00 |         |      |       |                 | 18.95 | 87.00 |         |             |      |                 |         |      |      |                 |
| <i>M. tuberculosis</i> | 15-1115-2   | elephant   | 20.38 | 86.95 | 86.96   | 0.02 | 0.02 |                 | 20.53 | 87.00 | 87.00   | 0.00 | 0.00  |                 | 20.78 | 87.00 | 87.01   | 0.01        | 0.01 |                 | 86.99   | 0.03 | 0.03 |                 |
|                        |             |            | 19.94 | 86.98 |         |      |      |                 | 20.53 | 87.00 |         |      |       |                 | 20.65 | 87.00 |         |             |      |                 |         |      |      |                 |
|                        |             |            | 20.08 | 86.95 |         |      |      |                 | 20.30 | 87.00 |         |      |       |                 | 20.60 | 87.02 |         |             |      |                 |         |      |      |                 |
| <i>M. tuberculosis</i> | 15-1221-1   | elephant   | 23.48 | 86.97 | 86.99   | 0.03 | 0.03 | 0.02            | 23.74 | 86.98 | 86.97   | 0.02 | 0.02  | 0.01            | 23.98 | 86.98 | 87.00   | 0.02        | 0.02 | 0.02            | 86.99   | 0.02 | 0.02 | 0.02            |
|                        |             |            | 23.83 | 86.97 |         |      |      |                 | 24.01 | 86.95 |         |      |       |                 | 24.20 | 87.02 |         |             |      |                 |         |      |      |                 |
|                        |             |            | 23.53 | 87.02 |         |      |      |                 | 23.58 | 86.98 |         |      |       |                 | 23.85 | 87.00 |         |             |      |                 |         |      |      |                 |
| <i>M. caprae</i>       | 14-13       | cow        | 26.57 | 86.57 | 86.59   | 0.02 | 0.02 |                 | 27.27 | 86.55 | 86.56   | 0.01 | 0.01  |                 | 27.72 | 86.60 | 86.61   | 0.01        | 0.01 |                 | 86.59   | 0.03 | 0.03 |                 |
|                        |             |            | 26.82 | 86.60 |         |      |      |                 | 27.37 | 86.57 |         |      |       |                 | 27.44 | 86.62 |         |             |      |                 |         |      |      |                 |
|                        |             |            | 26.52 | 86.60 |         |      |      |                 | 27.24 | 86.55 |         |      |       |                 | 28.26 | 86.62 |         |             |      |                 |         |      |      |                 |
| <i>M. caprae</i>       | 22914       | cow        | 23.99 | 86.58 | 86.58   | 0.00 | 0.00 |                 | 24.29 | 86.57 | 86.55   | 0.02 | 0.02  |                 | 24.46 | 86.65 | 86.64   | 0.01        | 0.01 |                 | 86.59   | 0.04 | 0.05 |                 |
|                        |             |            | 23.87 | 86.58 |         |      |      |                 | 24.23 | 86.53 |         |      |       |                 | 24.75 | 86.63 |         |             |      |                 |         |      |      |                 |
|                        |             |            | 23.97 | 86.58 |         |      |      |                 | 24.33 | 86.55 |         |      |       |                 | 24.41 | 86.63 |         |             |      |                 |         |      |      |                 |
| <i>M. caprae</i>       | 22848       | cow        | 26.57 | 86.58 | 86.59   | 0.01 | 0.01 |                 | 26.63 | 86.57 | 86.56   | 0.01 | 0.01  |                 | 26.98 | 86.60 | 86.60   | 0.00        | 0.00 |                 | 86.58   | 0.02 | 0.03 |                 |
|                        |             |            | 26.73 | 86.60 |         |      |      |                 | 26.48 | 86.55 |         |      |       |                 | 27.23 | 86.60 |         |             |      |                 |         |      |      |                 |
|                        |             |            | 26.55 | 86.58 |         |      |      |                 | 26.64 | 86.55 |         |      |       |                 | 27.14 | 86.60 |         |             |      |                 |         |      |      |                 |
| <i>M. caprae</i>       | 22966       | cow        | 23.75 | 86.55 | 86.58   | 0.03 | 0.03 |                 | 23.66 | 86.60 | 86.58   | 0.02 | 0.02  |                 | 24.22 | 86.58 | 86.59   | 0.01        | 0.01 |                 | 86.58   | 0.00 | 0.00 |                 |
|                        |             |            | 23.00 | 86.60 |         |      |      |                 | 23.61 | 86.58 |         |      |       |                 | 24.03 | 86.60 |         |             |      |                 |         |      |      |                 |
|                        |             |            | 23.44 | 86.60 |         |      |      |                 | 23.75 | 86.57 |         |      |       |                 | 23.91 | 86.58 |         |             |      |                 |         |      |      |                 |
| <i>M. caprae</i>       | 13-450      | cow        | 21.29 | 86.58 | 86.58   | 0.01 | 0.01 |                 | 21.39 | 86.57 | 86.60   | 0.03 | 0.03  |                 | 21.48 | 86.58 | 86.60   | 0.02        | 0.02 |                 | 86.59   | 0.01 | 0.01 |                 |
|                        |             |            | 21.23 | 86.57 |         |      |      |                 | 21.35 | 86.60 |         |      |       |                 | 21.47 | 86.60 |         |             |      |                 |         |      |      |                 |
|                        |             |            | 21.29 | 86.58 |         |      |      |                 | 21.31 | 86.62 |         |      |       |                 | 21.57 | 86.62 |         |             |      |                 |         |      |      |                 |
| <i>M. caprae</i>       | 13-162      | cow        | 25.11 | 86.58 | 86.56   | 0.03 | 0.03 | 0.02            | 25.41 | 86.63 | 86.63   | 0.01 | 0.01  | 0.02            | 25.82 | 86.58 | 86.60   | 0.02        | 0.02 | 0.01            | 86.60   | 0.03 | 0.04 | 0.03            |
|                        |             |            | 25.17 | 86.53 |         |      |      |                 | 25.55 | 86.63 |         |      |       |                 | 25.72 | 86.60 |         |             |      |                 |         |      |      |                 |
|                        |             |            | 24.82 | 86.57 |         |      |      |                 | 25.54 | 86.62 |         |      |       |                 | 25.88 | 86.62 |         |             |      |                 |         |      |      |                 |
| <i>M. bovis</i>        | 20482       | cow        | 26.55 | 86.55 | 86.56   | 0.01 | 0.01 |                 | 26.61 | 86.62 | 86.61   | 0.02 | 0.03  |                 | 26.86 | 86.62 | 86.63   | 0.02        | 0.02 |                 | 86.60   | 0.03 | 0.04 |                 |
|                        |             |            | 26.39 | 86.57 |         |      |      |                 | 26.64 | 86.62 |         |      |       |                 | 26.96 | 86.65 |         |             |      |                 |         |      |      |                 |
|                        |             |            | 26.31 | 86.57 |         |      |      |                 | 26.28 | 86.58 |         |      |       |                 | 26.81 | 86.62 |         |             |      |                 |         |      |      |                 |
| <i>M. bovis</i>        | 20594       | cow        | 28.22 | 86.55 | 86.54   | 0.01 | 0.01 |                 | 28.52 | 86.60 | 86.61   | 0.01 | 0.01  |                 | 29.66 | 86.65 | 86.65   | 0.02        | 0.02 |                 | 86.60   | 0.05 | 0.06 |                 |
|                        |             |            | 27.85 | 86.53 |         |      |      |                 | 28.53 | 86.62 |         |      |       |                 | 28.72 | 86.63 |         |             |      |                 |         |      |      |                 |
|                        |             |            | 27.40 | 86.55 |         |      |      |                 | 28.42 | 86.60 |         |      |       |                 | 29.28 | 86.67 |         |             |      |                 |         |      |      |                 |
| <i>M. bovis</i>        | 20175       | cow        | 22.06 | 86.55 | 86.58   | 0.03 | 0.03 |                 | 21.80 | 86.58 | 86.57   | 0.02 | 0.02  |                 | 22.20 | 86.62 | 86.64   | 0.02        | 0.02 |                 | 86.60   | 0.04 | 0.04 |                 |
|                        |             |            | 21.30 | 86.58 |         |      |      |                 | 21.72 | 86.58 |         |      |       |                 | 22.22 | 86.65 |         |             |      |                 |         |      |      |                 |
|                        |             |            | 22.02 | 86.60 |         |      |      |                 | 21.95 | 86.55 |         |      |       |                 | 22.43 | 86.65 |         |             |      |                 |         |      |      |                 |
| <i>M. bovis</i>        | 20606       | cow        | 24.19 | 86.62 | 86.60   | 0.02 | 0.02 |                 | 24.73 | 86.60 | 86.59   | 0.01 | 0.01  |                 | 24.43 | 86.65 | 86.65   | 0.00        | 0.00 |                 | 86.61   | 0.03 | 0.04 |                 |
|                        |             |            | 24.30 | 86.58 |         |      |      |                 | 24.27 | 86.58 |         |      |       |                 | 24.58 | 86.65 |         |             |      |                 |         |      |      |                 |
|                        |             |            | 24.23 | 86.60 |         |      |      |                 | 24.56 | 86.60 |         |      |       |                 | 24.78 | 86.65 |         |             |      |                 |         |      |      |                 |
| <i>M. bovis</i>        | 22667       | cow        | 22.92 | 86.60 | 86.61   | 0.01 | 0.01 |                 | 22.91 | 86.60 | 86.62   | 0.03 | 0.03  |                 | 23.33 | 86.65 | 86.64   | 0.01        | 0.01 |                 | 86.62   | 0.02 | 0.02 |                 |
|                        |             |            | 22.87 | 86.62 |         |      |      |                 | 23.20 | 86.65 |         |      |       |                 | 23.46 | 86.65 |         |             |      |                 |         |      |      |                 |
|                        |             |            | 23.06 | 86.60 |         |      |      |                 | 23.03 | 86.60 |         |      |       |                 | 23.43 | 86.63 |         |             |      |                 |         |      |      |                 |
| <i>M. bovis</i>        | 22539       | cow        | 24.09 | 86.62 | 86.61   | 0.01 | 0.01 | 0.02            | 24.39 | 86.60 | 86.61   | 0.02 | 0.02  | 0.02            | 24.79 | 86.60 | 86.61   | 0.02        | 0.02 | 0.02            | 86.61   | 0.00 | 0.00 | 0.03            |
|                        |             |            | 23.91 | 86.60 |         |      |      |                 | 24.59 | 86.60 |         |      |       |                 | 24.67 | 86.63 |         |             |      |                 |         |      |      |                 |
|                        |             |            | 24.31 | 86.62 |         |      |      |                 | 24.24 | 86.63 |         |      |       |                 | 25.08 | 86.60 |         |             |      |                 |         |      |      |                 |
| <i>M. microti</i>      | 22928       | cat        | 20.62 | 86.70 | 86.73   | 0.03 | 0.03 |                 | 20.57 | 86.75 | 86.76   | 0.01 | 0.01  |                 | 20.79 | 86.73 | 86.73   | 0.03        | 0.03 |                 | 86.74   | 0.02 | 0.02 |                 |
|                        |             |            | 20.63 | 86.75 |         |      |      |                 | 20.76 | 86.77 |         |      |       |                 | 20.53 | 86.70 |         |             |      |                 |         |      |      |                 |
|                        |             |            | 20.72 | 86.73 |         |      |      |                 | 20.86 | 86.75 |         |      |       |                 | 20.74 | 86.75 |         |             |      |                 |         |      |      |                 |
| <i>M. microti</i>      | 15-1765     | cat        | 24.74 | 86.72 | 86.72   | 0.02 | 0.02 |                 | 24.84 | 86.78 | 86.76   | 0.02 | 0.02  |                 | 25.31 | 86.75 | 86.75   | 0.00        | 0.00 |                 | 86.74   | 0.02 | 0.03 |                 |
|                        |             |            | 24.48 | 86.73 |         |      |      |                 | 24.74 | 86.75 |         |      |       |                 | 25.42 | 86.75 |         |             |      |                 |         |      |      |                 |
|                        |             |            | 24.96 | 86.70 |         |      |      |                 | 24.76 | 86.75 |         |      |       |                 | 25.15 | 86.75 |         |             |      |                 |         |      |      |                 |
| <i>M. microti</i>      | 14-58       | cat        | 28.43 | 86.67 | 86.71   | 0.03 | 0.04 |                 | 28.04 | 86.77 | 86.77   | 0.01 | 0.01  |                 | 28.91 | 86.75 | 86.77   | 0.02        | 0.02 |                 | 86.75   | 0.04 | 0.04 |                 |
|                        |             |            | 28.38 | 86.73 |         |      |      |                 | 28.55 | 86.78 |         |      |       |                 | 28.36 | 86.78 |         |             |      |                 |         |      |      |                 |
|                        |             |            | 28.48 | 86.72 |         |      |      |                 | 28.53 | 86.77 |         |      |       |                 | 29.15 | 86.77 |         |             |      |                 |         |      |      |                 |
| <i>M. microti</i>      | 15-1955     | cat        | 24.62 | 86.73 | 86.75   | 0.02 | 0.02 |                 | 24.81 | 86.77 | 86.76   | 0.01 | 0.01  |                 | 25.08 | 86.80 | 86.78   | 0.02        | 0.02 |                 | 86.76   | 0.02 | 0.02 |                 |
|                        |             |            | 24.08 | 86.77 |         |      |      |                 | 24.45 | 86.77 |         |      |       |                 | 24.69 | 86.77 |         |             |      |                 |         |      |      |                 |
|                        |             |            | 23.90 | 86.75 |         |      |      |                 | 24.62 | 86.75 |         |      |       |                 | 24.87 | 86.77 |         |             |      |                 |         |      |      |                 |
| <i>M. microti</i>      | 16-2156     | cat        | 26.87 | 8     |         |      |      |                 |       |       |         |      |       |                 |       |       |         |             |      |                 |         |      |      |                 |



**Supplementary Figure S1.** Real-time-PCR amplification curves and standard curves of the serial dilution using (a) *M. tuberculosis* H37Rv; (b) *M. bovis* BCG Pasteur ATCC 35734 and (c) *M. microti* ATCC 19422.

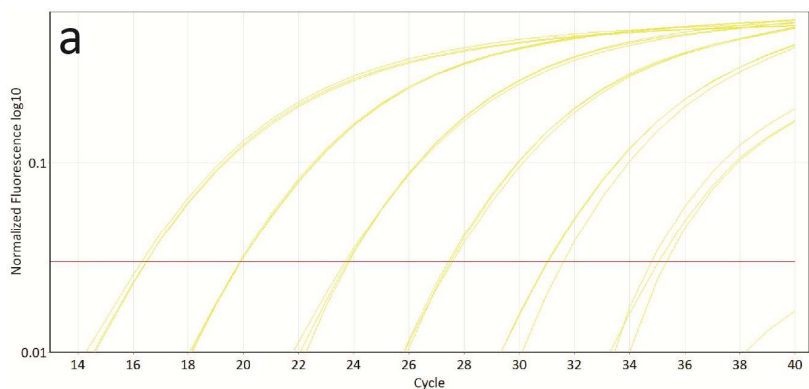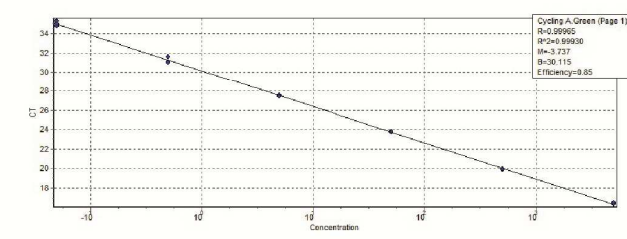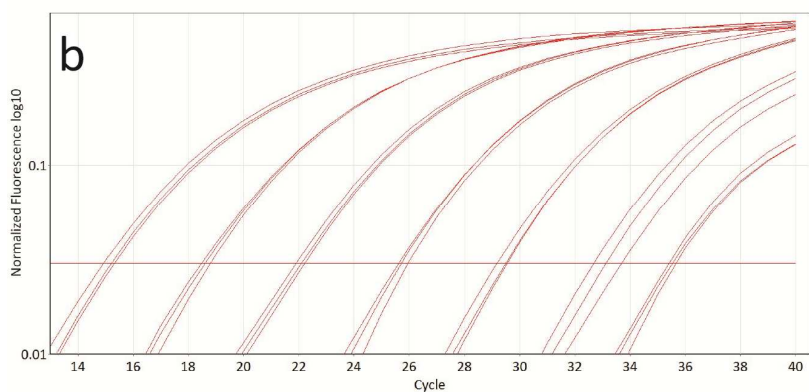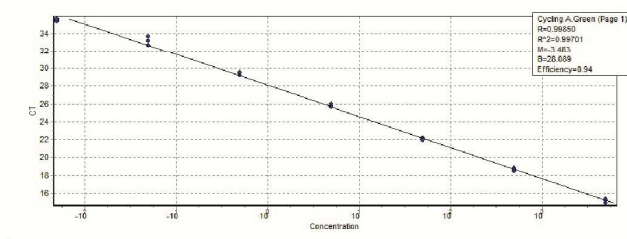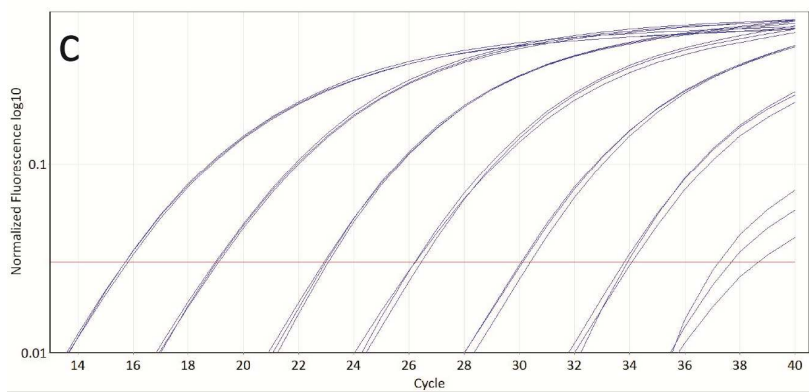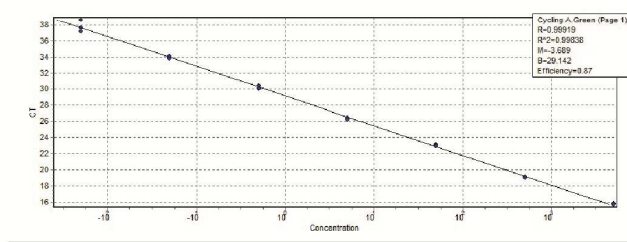

**Supplementary Table <sup>S3</sup>. MTBC positive isolates used for the development of the high resolution melting assay.**

| Sample                            | Species                | Origin           | Specimen                                          | Culture?        | Clinical specimen? |
|-----------------------------------|------------------------|------------------|---------------------------------------------------|-----------------|--------------------|
| <b><i>M. bovis</i> (15)</b>       |                        |                  |                                                   |                 |                    |
| 20175                             | <i>M. bovis</i>        | cow              | lung                                              | cultured        | not available      |
| 20482                             | <i>M. bovis</i>        | cow              | lung, lymph node pool                             | cultured        | not available      |
| 20531                             | <i>M. bovis</i>        | cow              | lymph node pool                                   | cultured        | not available      |
| 20593                             | <i>M. bovis</i>        | cow              | lymph node pool                                   | cultured        | clinical specimen  |
| 20594                             | <i>M. bovis</i>        | cow              | lymph node pool                                   | cultured        | clinical specimen  |
| 20596                             | <i>M. bovis</i>        | cow              | lymph node pool                                   | cultured        | clinical specimen  |
| 20597                             | <i>M. bovis</i>        | cow              | lymph node pool                                   | cultured        | not available      |
| 20599                             | <i>M. bovis</i>        | cow              | lymph node pool                                   | cultured        | not available      |
| 20600                             | <i>M. bovis</i>        | cow              | lymph node pool                                   | cultured        | clinical specimen  |
| 20606                             | <i>M. bovis</i>        | cow              | lymph node pool                                   | cultured        | clinical specimen  |
| 20608                             | <i>M. bovis</i>        | cow              | lymph node pool                                   | cultured        | clinical specimen  |
| 20609                             | <i>M. bovis</i>        | cow              | lymph node pool                                   | cultured        | clinical specimen  |
| 20665                             | <i>M. bovis</i>        | cow              | lymph node pool                                   | cultured        | not available      |
| 22539                             | <i>M. bovis</i>        | cow              | lymph node                                        | cultured        | not available      |
| 22667                             | <i>M. bovis</i>        | cow              | lymph node                                        | cultured        | not available      |
| <b><i>M. caprae</i> (8)</b>       |                        |                  |                                                   |                 |                    |
| 14-13                             | <i>M. caprae</i>       | Cow              | lymph node                                        | cultured        | clinical specimen  |
| 22914                             | <i>M. caprae</i>       | Cow              | lymph node pool                                   | cultured        | clinical specimen  |
| 22971                             | <i>M. caprae</i>       | Cow              | lymph node pool                                   | cultured        | clinical specimen  |
| 22848                             | <i>M. caprae</i>       | Cow              | liver, lung, lymph node pool                      | cultured        | clinical specimen  |
| 22966                             | <i>M. caprae</i>       | Cow              | lymph node pool                                   | cultured        | not available      |
| 13-450                            | <i>M. caprae</i>       | Cow              | lymph node                                        | cultured        | not available      |
| 13-162                            | <i>M. caprae</i>       | Cow              | lymph node                                        | cultured        | not available      |
| 20948                             | <i>M. caprae</i>       | Cow              | lymph node                                        | not available   | clinical specimen  |
| <b><i>M. microti</i> (15)</b>     |                        |                  |                                                   |                 |                    |
| 22928                             | <i>M. microti</i>      | cat              | lung, lymph node pool                             | cultured        | clinical specimen  |
| 15-1765                           | <i>M. microti</i>      | cat              | lung                                              | cultured        | clinical specimen  |
| 15-342                            | <i>M. microti</i>      | alpaca           | lymph node                                        | cultured        | clinical specimen  |
| 14-58                             | <i>M. microti</i>      | cat              | lung                                              | cultured        | clinical specimen  |
| 14-690                            | <i>M. microti</i>      | alpaca           | liver                                             | cultured        | clinical specimen  |
| 17-2287                           | <i>M. microti</i>      | alpaca           | spleen                                            | cultured        | clinical specimen  |
| 15817                             | <i>M. microti</i>      | lama             | lymph node                                        | cultured        | clinical specimen  |
| 15-1955                           | <i>M. microti</i>      | cat              | lymph node                                        | cultured        | clinical specimen  |
| 16-2156                           | <i>M. microti</i>      | cat              | bronchoalveolar lavage                            | cultured        | not available      |
| 1522744                           | <i>M. microti</i>      | cat              | lung, lymph node pool                             | cultured        | not available      |
| 16-1347                           | <i>M. microti</i>      | cat              | lung                                              | cultured        | not available      |
| 17-1084                           | <i>M. microti</i>      | cat              | lymph node, skin                                  | culture ongoing | clinical specimen  |
| 17-549                            | <i>M. microti</i>      | lama             | liver                                             | cultured        | clinical specimen  |
| 17-1063                           | <i>M. microti</i>      | alpaca           | lymph node, lung, heart, liver, cervical vertebra | culture ongoing | clinical specimen  |
| MI16                              | <i>M. microti</i>      | wildboar (Spain) | unknown                                           | cultured        | not available      |
| <b><i>M. tuberculosis</i> (4)</b> |                        |                  |                                                   |                 |                    |
| 15-961-2                          | <i>M. tuberculosis</i> | elephant 1       | lung                                              | cultured        | clinical specimen  |
| 15-961-1                          | <i>M. tuberculosis</i> | elephant 1       | pharyngeal swab                                   | not cultivated  | clinical specimen  |
| 15-1115-2                         | <i>M. tuberculosis</i> | elephant 2       | lung                                              | cultured        | not available      |
| 15-1221-1                         | <i>M. tuberculosis</i> | elephant 3       | lung                                              | cultured        | not available      |

**Supplementary Table <sup>S4</sup>**. An exclusivity panel consisting of 41 non-tuberculous mycobacteria and 3 non-mycobacterial species were tested for specificity of the high resolution melting assay.

| Species                                        | No. of isolates | Species                     | No. of isolates |
|------------------------------------------------|-----------------|-----------------------------|-----------------|
| <i>M. abscessus</i> sp.                        | 2               | <i>M. malmoense</i>         | 1               |
| <i>M. avium</i> subsp. <i>avium</i>            | 2               | <i>M. marinum</i>           | 1               |
| <i>M. avium</i> subsp. <i>hominissuis</i>      | 32              | <i>M. monacense</i>         | 3               |
| <i>M. avium</i> subsp. <i>paratuberculosis</i> | 1               | <i>M. nebraskense</i>       | 1               |
| <i>M. avium</i> subsp. <i>silvaticum</i>       | 1               | <i>M. neoaurum</i>          | 5               |
| <i>M. bourgelatii</i>                          | 1               | <i>M. nonchromogenicum</i>  | 7               |
| <i>M. celatum</i>                              | 1               | <i>M. palustre</i>          | 1               |
| <i>M. chelonae</i> subsp. <i>chelonae</i>      | 1               | <i>M. parafortuitum</i>     | 2               |
| <i>M. chimaera/intracellulare/youngonense</i>  | 1               | <i>M. paragordoniae</i>     | 6               |
| <i>M. chitae</i>                               | 1               | <i>M. peregrinum</i>        | 2               |
| <i>M. elephantis</i>                           | 1               | <i>M. persicum</i>          | 2               |
| <i>M. engbaekii</i>                            | 1               | <i>M. phlei</i>             | 3               |
| <i>M. europaeum</i>                            | 1               | <i>M. scrofulaceum</i>      | 1               |
| <i>M. fortuitum/porcinum</i>                   | 1               | <i>M. simiae</i>            | 1               |
| <i>M. goodii</i>                               | 1               | <i>M. smegmatis</i>         | 1               |
| <i>M. gordonae</i>                             | 2               | <i>M. szulgai</i>           | 1               |
| <i>M. hassiacum</i>                            | 1               | <i>M. terrae</i>            | 1               |
| <i>M. interjectum/paraense</i>                 | 1               | <i>M. vaccae</i>            | 4               |
| <i>M. intermedium</i>                          | 1               | <i>M. xenopi</i>            | 5               |
| <i>M. intracellulare</i>                       | 3               | <i>Nocardia paucivorans</i> | 1               |
| <i>M. kansasii</i>                             | 10              | <i>Escherichia coli</i>     | 1               |
| <i>M. lymphaticum</i>                          | 1               | <i>Streptococcus suis</i>   | 1               |
